# Supplementary material for: Gut Microbiota in Patients with Postoperative Atrial Fibrillation Undergoing Off-Pump Coronary Bypass Graft Surgery
Source: MDPI journal article supplement (doi:10.3390/jcm12041493), 2023-02-13
Supplement: s1 [file s1]

Supplementary Table S2.

| Biomarkers                                                                                                                  | Groups | LDA    | p                       |
|-----------------------------------------------------------------------------------------------------------------------------|--------|--------|-------------------------|
| D1__Bacteria.D2__Proteobacteria.D3__Gammaproteobacteria.                                                                    | No-    | 4.3553 | 0.0001                  |
| D4__Enterobacteriales                                                                                                       | POAF   | 36     | 59                      |
| D1__Bacteria.D2__Proteobacteria.D3__Gammaproteobacteria.                                                                    | No-    | 4.3553 | 0.0001                  |
| D4__Enterobacteriales.D5__Enterobacteriaceae                                                                                | POAF   | 36     | 59                      |
| D1__Bacteria.D2__Proteobacteria.D3__Gammaproteobacteria                                                                     | No-    | 4.2403 | 0.0015                  |
|                                                                                                                             | POAF   | 85     | 77                      |
| D1__Bacteria.D2__Proteobacteria.D3__Gammaproteobacteria.                                                                    | No-    | 4.1069 | 0.0012                  |
| D4__Enterobacteriales.D5__Enterobacteriaceae.D6__ <i>Escherichia Shigella</i>                                               | POAF   | 85     | 74                      |
| D1__Bacteria.D2__Proteobacteria                                                                                             | No-    | 3.9950 | 0.0229                  |
|                                                                                                                             | POAF   | 73     | 58                      |
| D1__Bacteria.D2__Actinobacteria                                                                                             | POAF   | 3.9180 | 7.18 × 10 <sup>-5</sup> |
| D1__Bacteria.D2__Proteobacteria.D3__Gammaproteobacteria.                                                                    | No-    | 3.8750 | 0.0005                  |
| D4__Enterobacteriales.D5__Enterobacteriaceae.D6__ <i>Klebsiella</i>                                                         | POAF   | 9      | 15                      |
| D1__Bacteria.D2__Actinobacteria.D3__Actinobacteria                                                                          | POAF   | 3.8063 | 0.0013                  |
|                                                                                                                             |        | 72     | 39                      |
| D1__Bacteria.D2__Proteobacteria.D3__Alphaproteobacteria.D4__Caulobacteriales                                                | POAF   | 3.7392 | 0.0270                  |
|                                                                                                                             |        | 17     | 78                      |
| D1__Bacteria.D2__Proteobacteria.D3__Alphaproteobacteria.D4__Caulobacteriales.D5__Caulobacteraceae                           | POAF   | 3.7384 | 0.0274                  |
|                                                                                                                             |        | 13     | 32                      |
| D1__Bacteria.D2__Proteobacteria.D3__Alphaproteobacteria.D4__Caulobacteriales.D5__Caulobacteraceae.D6__ <i>Brevundimonas</i> | POAF   | 3.6909 | 0.0083                  |
|                                                                                                                             |        | 53     | 09                      |
| D1__Bacteria.D2__Proteobacteria.D3__Gammaproteobacteria.                                                                    | POAF   | 3.6323 | 0.0257                  |
| D4__ <i>Pseudomonadales</i> .D5__Moraxellaceae                                                                              |        | 91     | 98                      |
| D1__Bacteria.D2__Proteobacteria.D3__Gammaproteobacteria.                                                                    | POAF   | 3.6051 | 0.0205                  |
| D4__Pseudomonadales.D5__Moraxellaceae.D6__ <i>Acinetobacter</i>                                                             |        | 87     | 19                      |
| D1__Bacteria.D2__Proteobacteria.D3__Alphaproteobacteria.D4__Rhizobiales                                                     | POAF   | 3.5574 | 0.0078                  |
|                                                                                                                             |        | 77     | 93                      |
| D1__Bacteria.D2__Bacteroidetes.D3__Bacteroidia.D4__Bacteroidales.D5__ <i>Prevotellaceae</i> .D6__ <i>Alloprevotella</i>     | No-    | 3.4248 | 7.66 × 10 <sup>-7</sup> |
|                                                                                                                             | POAF   | 63     |                         |
| D1__Bacteria.D2__Actinobacteria.D3__Actinobacteria.D4__Micrococcales                                                        | POAF   | 3.3779 | 0.0181                  |
|                                                                                                                             |        | 31     | 87                      |
| D1__Bacteria.D2__Firmicutes.D3__Clostridia.D4__Clostridiales.D5__Lachnospiraceae.D6__ <i>Ruminococcus gnavus</i> group      | No-    | 3.3471 | 0.0008                  |
|                                                                                                                             | POAF   | 46     | 37                      |
| D1__Bacteria.D2__Proteobacteria.D3__Gammaproteobacteria.                                                                    | No-    | 3.3309 | 0.0095                  |
| D4__Enterobacteriales.D5__Enterobacteriaceae.D6__ <i>Citrobacter</i>                                                        | POAF   | 02     | 54                      |
| D1__Bacteria.D2__Firmicutes.D3__Clostridia.D4__Clostridiales.D5__Ruminococcaceae.D6__ <i>Ruminococcus</i> 2                 | No-    | 3.3215 | 0.0078                  |
|                                                                                                                             | POAF   | 32     | 63                      |
| D1__Bacteria.D2__Actinobacteria.D3__Thermoleophilia                                                                         | POAF   | 3.3123 | 0.0101                  |
|                                                                                                                             |        | 96     | 72                      |

|                                                                                                                                                         |             |        |                   |
|---------------------------------------------------------------------------------------------------------------------------------------------------------|-------------|--------|-------------------|
| D1__Bacteria.D2__Firmicutes.D3__Clostridia.D4__Clostridiales.D5__Lachnospiraceae.D6__ <b>Lachnospira</b>                                                | POAF        | 3.2797 | 0.0086            |
|                                                                                                                                                         |             | 77     | 72                |
| D1__Bacteria.D2__Actinobacteria.D3__Coriobacteriia.D4__Coriobacteriales.D5__Atopobiaceae.D6__ <b>Olsenella</b>                                          | No-<br>POAF | 3.2534 | 0.0166            |
|                                                                                                                                                         |             | 76     | 56                |
| D1__Bacteria.D2__Firmicutes.D3__Erysipelotrichia.D4__Erysipelotrichales                                                                                 | No-<br>POAF | 3.2244 | 0.0269            |
|                                                                                                                                                         |             | 11     | 29                |
| D1__Bacteria.D2__Firmicutes.D3__Erysipelotrichia                                                                                                        | No-<br>POAF | 3.2244 | 0.0269            |
|                                                                                                                                                         |             | 11     | 29                |
| D1__Bacteria.D2__Firmicutes.D3__Erysipelotrichia.D4__Erysipelotrichales.D5__Erysipelotrichaceae                                                         | No-<br>POAF | 3.2244 | 0.0269            |
|                                                                                                                                                         |             | 11     | 29                |
| D1__Bacteria.D2__Verrucomicrobia.D3__Verrucomicrobiae                                                                                                   | POAF        | 3.2201 | 0.0024            |
|                                                                                                                                                         |             | 05     | 66                |
| D1__Bacteria.D2__Verrucomicrobia                                                                                                                        | POAF        | 3.2201 | 0.0024            |
|                                                                                                                                                         |             | 05     | 66                |
| D1__Bacteria.D2__Actinobacteria.D3__Thermoleophilia.D4__Gaiellales                                                                                      | POAF        | 3.2064 | 0.0158            |
|                                                                                                                                                         |             | 38     | 82                |
| D1__Bacteria.D2__Proteobacteria.D3__Gammaproteobacteria.D4__Aeromonadales                                                                               | POAF        | 3.2038 | 2.05 ×            |
|                                                                                                                                                         |             | 35     | 10 <sup>-12</sup> |
| D1__Bacteria.D2__Proteobacteria.D3__Gammaproteobacteria.D4__Aeromonadales.D5__Aeromonadaceae                                                            | POAF        | 3.1808 | 3.64 ×            |
|                                                                                                                                                         |             | 08     | 10 <sup>-12</sup> |
| D1__Bacteria.D2__Proteobacteria.D3__Gammaproteobacteria.D4__Aeromonadales.D5__Aeromonadaceae.D6__ <b>Aeromonas</b>                                      | POAF        | 3.1808 | 3.64 ×            |
|                                                                                                                                                         |             | 08     | 10 <sup>-12</sup> |
| D1__Bacteria.D2__Acidobacteria                                                                                                                          | POAF        | 3.1792 | 0.0252            |
|                                                                                                                                                         |             | 49     | 04                |
| D1__Bacteria.D2__Proteobacteria.D3__Alphaproteobacteria.D4__Rhizobiales.D5__Rhizobiaceae                                                                | POAF        | 3.1713 | 0.0253            |
|                                                                                                                                                         |             | 25     | 12                |
| D1__Bacteria.D2__Proteobacteria.D3__Alphaproteobacteria.D4__Rhizobiales.D5__Rhizobiaceae.D6__Allorhizobium_Neorhizobium_Pararhizobium_ <b>Rhizobium</b> | POAF        | 3.1648 | 0.0261            |
|                                                                                                                                                         |             | 91     | 3                 |
| D1__Bacteria.D2__Firmicutes.D3__Bacilli.D4__Bacillales                                                                                                  | POAF        | 3.1465 | 0.0318            |
|                                                                                                                                                         |             | 62     | 55                |
| D1__Bacteria.D2__Verrucomicrobia.D3__Verrucomicrobiae.D4__Verrucomicrobiales                                                                            | POAF        | 3.1399 | 0.0139            |
|                                                                                                                                                         |             | 19     | 35                |
| D1__Bacteria.D2__Verrucomicrobia.D3__Verrucomicrobiae.D4__Verrucomicrobiales.D5__Akkermansiaceae                                                        | POAF        | 3.1399 | 0.0105            |
|                                                                                                                                                         |             | 16     | 14                |
| D1__Bacteria.D2__Verrucomicrobia.D3__Verrucomicrobiae.D4__Verrucomicrobiales.D5__Akkermansiaceae.D6__Akkermansi                                         | POAF        | 3.1399 | 0.0105            |
| a                                                                                                                                                       |             | 16     | 14                |
| D1__Bacteria.D2__Proteobacteria.D3__Alphaproteobacteria.D4__Rhizobiales.D5__Xanthobacteraceae                                                           | POAF        | 3.1112 | 0.0045            |
|                                                                                                                                                         |             | 56     | 47                |
| D1__Bacteria.D2__Proteobacteria.D3__Gammaproteobacteria.D4__Pasteurellales.D5__Pasteurellaceae                                                          | No-<br>POAF | 3.0557 | 7.77 ×            |
|                                                                                                                                                         |             | 87     | 10 <sup>-5</sup>  |
| D1__Bacteria.D2__Proteobacteria.D3__Gammaproteobacteria.D4__Pasteurellales                                                                              | No-<br>POAF | 3.0557 | 7.77 ×            |
|                                                                                                                                                         |             | 87     | 10 <sup>-5</sup>  |

|                                                                |      |        |                  |
|----------------------------------------------------------------|------|--------|------------------|
| D1__Bacteria.D2__Proteobacteria.D3__Gammaproteobacteria.       | No-  | 3.0229 | 9.46 ×           |
| D4__Pasteurellales.D5__Pasteurellaceae.D6__ <b>Haemophilus</b> | POAF | 02     | 10 <sup>-5</sup> |

---
