# Supplementary material for: Gut Microbiota in Patients with Postoperative Atrial Fibrillation Undergoing Off-Pump Coronary Bypass Graft Surgery
Source: MDPI journal article supplement (doi:10.3390/jcm12041493), 2023-02-13
Supplement: s1 [file s1]

Supplementary Table S1. Differences in gut microbiota composition in patients with POAF and no POAF.

| Taxonomy                                           | Mean (POAF) | Variance (POAF)       | Std.err (PAOF) | Mean (no-POAF)        | Variance (no_POAF)    | Std.err (no_POAF)     | p Value                |
|----------------------------------------------------|-------------|-----------------------|----------------|-----------------------|-----------------------|-----------------------|------------------------|
| Escherichia-Shigella                               | 0.031794922 | 0.002655              | 0.007768       | 0.058859              | 0.007993              | 0.009424              | 0.043                  |
| Klebsiella                                         | 0.01844616  | 0.00032               | 0.002697       | 0.032741              | 0.001682              | 0.004323              | 0.002                  |
| Streptococcus                                      | 0.011741429 | 0.000223              | 0.002252       | 0.021138              | 0.001193              | 0.003641              | 0.029                  |
| Lachnospira                                        | 0.009078976 | 0.000225              | 0.002261       | 0.005029              | $2.09 \times 10^{-5}$ | 0.000482              | 0.007309               |
| Brevundimonas                                      | 0.008099381 | 0.000888              | 0.004492       | 0.000283              | $5.46 \times 10^{-6}$ | 0.000246              | $1.02 \times 10^{-14}$ |
| Acinetobacter                                      | 0.007484666 | 0.000612              | 0.00373        | 0.00107               | $1.03 \times 10^{-5}$ | 0.000338              | $4.30 \times 10^{-9}$  |
| Veillonella                                        | 0.007247389 | 0.000324              | 0.002714       | 0.00378               | $3.19 \times 10^{-5}$ | 0.000595              | 0.00837                |
| Aeromonas                                          | 0.003795764 | $1.49 \times 10^{-5}$ | 0.000582       | 0.000841              | $2.21 \times 10^{-6}$ | 0.000157              | 0.000382               |
| Citrobacter                                        | 0.002899961 | $1.77 \times 10^{-5}$ | 0.000634       | 0.007358              | 0.000507              | 0.002373              | 0.001597               |
| Prevotella_2                                       | 0.002642426 | $3.22 \times 10^{-5}$ | 0.000856       | 0.005454              | 0.000142              | 0.001256              | 0.028578               |
| Allorhizobium-Neorhizobium-Pararhizobium-Rhizobium | 0.002637651 | $5.74 \times 10^{-5}$ | 0.001142       | 0.000264              | $8.95 \times 10^{-7}$ | $9.97 \times 10^{-5}$ | $6.89 \times 10^{-5}$  |
| Ruminococcus_gnavus_group                          | 0.002379556 | $1.10 \times 10^{-5}$ | 0.000501       | 0.006893              | 0.000218              | 0.001557              | 0.000358               |
| Microbacterium                                     | 0.002371896 | $5.72 \times 10^{-5}$ | 0.00114        | 0.000166              | $6.17 \times 10^{-7}$ | $8.28 \times 10^{-5}$ | 0.000112               |
| Alloprevotella                                     | 0.002155109 | $3.82 \times 10^{-5}$ | 0.000932       | 0.007141              | 0.00019               | 0.001453              | $8.22 \times 10^{-5}$  |
| Candidatus_Udaeobacter                             | 0.001583488 | $2.98 \times 10^{-6}$ | 0.00026        | 0.00049               | $1.55 \times 10^{-6}$ | 0.000131              | 0.048068               |
| Barnesiella ,                                      | 0.001474752 | $5.91 \times 10^{-6}$ | 0.000366       | 0.003245              | $6.70 \times 10^{-5}$ | 0.000863              | 0.048451               |
| Pseudolabrys                                       | 0.001172537 | $1.84 \times 10^{-6}$ | 0.000204       | 0.000268              | $4.07 \times 10^{-7}$ | $6.73 \times 10^{-5}$ | 0.042423               |
| Caulobacter                                        | 0.000861221 | $8.41 \times 10^{-6}$ | 0.000437       | $5.01 \times 10^{-5}$ | $7.19 \times 10^{-8}$ | $2.83 \times 10^{-5}$ | 0.011614               |

|             |             |                       |                       |                       |                       |                       |          |
|-------------|-------------|-----------------------|-----------------------|-----------------------|-----------------------|-----------------------|----------|
| Leuconostoc | 0.000670923 | $4.23 \times 10^{-6}$ | 0.00031               | $4.06 \times 10^{-5}$ | $4.39 \times 10^{-8}$ | $2.21 \times 10^{-5}$ | 0.035387 |
| Haemophilus | 0.000641004 | $8.86 \times 10^{-7}$ | 0.000142              | 0.002555              | $5.33 \times 10^{-5}$ | 0.00077               | 0.020424 |
| Olsenella   | 0.000122325 | $1.35 \times 10^{-7}$ | $5.53 \times 10^{-5}$ | 0.002921              | 0.000459              | 0.002259              | 0.000628 |
